# Supplementary material
Source: PubMed Central journal article supplement (PMC5866738)
Supplement: NIHMS914918-supplement.pdf [file NIHMS914918-supplement.pdf]

Supplemental table. Item response probabilities for models fitting 2 to 8 classes.

|                          | 2-class model |         | 3-class model |         |         | 4-class model |         |         |         | 5-class model |         |         |         |         |         |         |
|--------------------------|---------------|---------|---------------|---------|---------|---------------|---------|---------|---------|---------------|---------|---------|---------|---------|---------|---------|
|                          | Class 1       | Class 2 | Class 1       | Class 2 | Class 3 | Class 1       | Class 2 | Class 3 | Class 4 | Class 1       | Class 2 | Class 3 | Class 4 | Class 5 | Class 1 | Class 2 |
| Reasons                  | 31.86%        | 68.14%  | 7.29%         | 63.35%  | 29.36%  | 28.82%        | 6.96%   | 6.93%   | 57.30%  | 46.49%        | 9.26%   | 6.33%   | 28.93%  | 8.98%   | 9.14%   | 6.36%   |
| Experiment               | 99.96%        | 33.36%  | 15.13%        | 37.15%  | 99.97%  | 100.0%        | 51.2%   | 13.7%   | 37.1%   | 38.27%        | 27.57%  | 12.51%  | 99.99%  | 50.35%  | 27.60%  | 12.76%  |
| Tastes good              | 6.70%         | 50.67%  | 35.78%        | 52.14%  | 5.13%   | 4.2%          | 95.6%   | 22.9%   | 47.5%   | 50.52%        | 25.20%  | 20.37%  | 4.54%   | 91.70%  | 24.77%  | 19.26%  |
| Boredom                  | 1.81%         | 31.19%  | 16.64%        | 32.60%  | 0.98%   | 0.6%          | 69.8%   | 5.8%    | 28.6%   | 31.25%        | 8.62%   | 5.05%   | 0.68%   | 66.60%  | 8.00%   | 4.75%   |
| Good time                | 1.97%         | 28.83%  | 7.45%         | 31.18%  | 1.01%   | 0.5%          | 58.5%   | 1.1%    | 27.9%   | 31.51%        | 7.76%   | 0.45%   | 0.37%   | 53.08%  | 7.02%   | 0.81%   |
| Relax                    | 2.21%         | 26.68%  | 33.73%        | 25.25%  | 2.19%   | 2.3%          | 72.2%   | 22.5%   | 20.3%   | 2.32%         | 99.14%  | 18.24%  | 0.52%   | 81.37%  | 99.53%  | 17.59%  |
| Looks cool               | 2.91%         | 18.21%  | 5.44%         | 19.63%  | 2.36%   | 2.3%          | 44.8%   | 1.0%    | 16.6%   | 20.35%        | 0.07%   | 0.68%   | 1.99%   | 36.18%  | 0.03%   | 0.96%   |
| Get high                 | 0.14%         | 9.93%   | 6.95%         | 10.08%  | 0.01%   | 0.1%          | 33.9%   | 3.0%    | 7.4%    | 5.92%         | 10.23%  | 2.81%   | 0.40%   | 31.30%  | 9.90%   | 2.77%   |
| Help quit cigarettes     | 0.01%         | 12.55%  | 94.47%        | 2.48%   | 0.07%   | 0.1%          | 32.4%   | 89.9%   | 0.1%    | 0.36%         | 0.03%   | 93.23%  | 0.07%   | 27.28%  | 0.02%   | 93.29%  |
| Cigarettes not permitted | 0.00%         | 7.58%   | 51.57%        | 2.14%   | 0.06%   | 0.2%          | 24.1%   | 44.1%   | 0.7%    | 0.72%         | 1.12%   | 45.64%  | 0.16%   | 19.87%  | 1.18%   | 45.11%  |
| Hooked                   | 0.00%         | 1.35%   | 3.88%         | 1.02%   | 0.00%   | 0.00%         | 6.92%   | 2.45%   | 0.47%   | 0.34%         | 1.18%   | 2.51%   | 0.00%   | 5.54%   | 1.11%   | 2.54%   |

| 6-class model |         |         |         | 7-class model |         |         |         |         |         |         | 8-class model |         |         |         |         |         |         |         |
|---------------|---------|---------|---------|---------------|---------|---------|---------|---------|---------|---------|---------------|---------|---------|---------|---------|---------|---------|---------|
| Class 3       | Class 4 | Class 5 | Class 6 | Class 1       | Class 2 | Class 3 | Class 4 | Class 5 | Class 6 | Class 7 | Class 1       | Class 2 | Class 3 | Class 4 | Class 5 | Class 6 | Class 7 | Class 8 |
| 36.65%        | 9.16%   | 29.19%  | 9.50%   | 11.80%        | 8.67%   | 3.87%   | 6.34%   | 29.26%  | 7.31%   | 32.74%  | 14.65%        | 98.00%  | 11.73%  | 5.43%   | 9.77%   | 0.0649  | 11.27%  | 30.86%  |
| 42.06%        | 49.08%  | 99.99%  | 22.71%  | 23.59%        | 49.28%  | 2.28%   | 12.46%  | 47.02%  | 2.23%   | 99.99%  | 37.19%        | 52.27%  | 33.50%  | 14.40%  | 51.88%  | 12.69%  | 22.78%  | 99.99%  |
| 38.13%        | 94.14%  | 3.69%   | 99.92%  | 27.16%        | 94.22%  | 1.03%   | 19.71%  | 46.83%  | 99.94%  | 9.12%   | 99.95%        | 92.17%  | 43.02%  | 0.21%   | 40.60%  | 20.32%  | 23.21%  | 0.09%   |
| 36.71%        | 65.92%  | 0.73%   | 11.47%  | 10.92%        | 65.31%  | 0.06%   | 5.15%   | 47.67%  | 6.98%   | 0.28%   | 0.11%         | 66.43%  | 99.84%  | 0.05%   | 30.96%  | 5.26%   | 1.75%   | 0.07%   |
| 40.61%        | 51.03%  | 0.05%   | 0.05%   | 8.42%         | 54.04%  | 99.86%  | 0.37%   | 33.93%  | 0.37%   | 2.26%   | 12.09%        | 56.97%  | 19.13%  | 99.88%  | 35.43%  | 0.29%   | 8.94%   | 2.44%   |
| 3.45%         | 79.49%  | 0.33%   | 0.21%   | 76.49%        | 79.22%  | 0.05%   | 18.13%  | 4.01%   | 0.24%   | 1.95%   | 2.39%         | 71.41%  | 9.81%   | 0.05%   | 2.26%   | 19.32%  | 73.03%  | 2.16%   |
| 26.13%        | 34.56%  | 1.80%   | 0.04%   | 0.00%         | 34.97%  | 0.03%   | 0.98%   | 32.72%  | 0.02%   | 2.03%   | 0.01%         | 35.77%  | 0.04%   | 0.02%   | 99.50%  | 0.75%   | 0.04%   | 0.16%   |
| 7.63%         | 30.63%  | 0.40%   | 0.03%   | 19.47%        | 31.45%  | 1.71%   | 2.76%   | 4.51%   | 0.01%   | 0.67%   | 2.12%         | 31.86%  | 1.08%   | 2.62%   | 1.56%   | 2.95%   | 22.61%  | 0.68%   |
| 0.05%         | 28.05%  | 0.08%   | 0.04%   | 0.03%         | 29.33%  | 0.40%   | 93.43%  | 0.02%   | 0.01%   | 0.18%   | 0.38%         | 24.99%  | 0.01%   | 0.27%   | 0.25%   | 92.38%  | 0.05%   | 0.01%   |
| 0.91%         | 19.71%  | 0.16%   | 0.00%   | 1.05%         | 20.33%  | 0.01%   | 45.61%  | 1.12%   | 0.00%   | 0.17%   | 0.00%         | 18.12%  | 1.04%   | 0.01%   | 0.85%   | 45.97%  | 1.16%   | 0.21%   |
| 0.42%         | 5.53%   | 0.00%   | 0.00%   | 2.48%         | 5.59%   | 0.00%   | 2.31%   | 0.00%   | 0.00%   | 0.00%   | 0.00%         | 4.88%   | 0.00%   | 0.00%   | 0.00%   | 2.37%   | 2.58%   | 0.00%   |
